# Supplementary material for: Do Mixtures of Beads with Different Sizes Improve Wet Stirred Media Milling of Drug Suspensions?
Source: MDPI journal article supplement (doi:10.3390/pharmaceutics15092213), 2023-08-26
Supplement: s1 [file s1]

## Supplementary Materials

# Do Mixtures of Beads with Different Sizes Improve Wet Stirred Media Milling of Drug Suspensions?

Gulenay Guner <sup>1,2</sup>, Mirsad Mehaj <sup>1</sup>, Natasha Seetharaman <sup>1</sup>, Sherif Elashri <sup>1</sup>, Helen F. Yao <sup>2</sup>, Donald J. Clancy <sup>2</sup>  
and Ecevit Bilgili <sup>1,\*</sup>

<sup>1</sup> Otto H. York Department of Chemical and Materials Engineering, New Jersey Institute of Technology,  
Newark, NJ 07102, USA

<sup>2</sup> Drug Product Development, GlaxoSmithKline, Collegeville, PA 19426, USA

\* Correspondence: bilgece@njit.edu; Tel.: +1-973-596-2998

**S1. All supporting data and analysis (except the analysis performed by JMP software).****Table S1.** Power per unit volume, apparent viscosity, and MHD parameters.

| Run No. | $P_w$ (W/m <sup>3</sup> ) | $\mu_L$ (mPa.s) | $g_0$ (-) | $\theta$ (m <sup>2</sup> /s <sup>2</sup> ) | $u_b$ (m/s)           | $\nu$ (kHz) | $\sigma_b^{\max}$ (GPa) | $\alpha_b$ (μm) | $a$ (mHz) | $\Pi \sigma_y$ (J <sup>2</sup> /m <sup>6</sup> s) |
|---------|---------------------------|-----------------|-----------|--------------------------------------------|-----------------------|-------------|-------------------------|-----------------|-----------|---------------------------------------------------|
| 1       | 4.90x10 <sup>5</sup>      | 119             | 5.62      | 1.93x10 <sup>-4</sup>                      | 2.22x10 <sup>-2</sup> | 3.30        | 0.846                   | 0.357           | 5.53      | 3.15x10 <sup>15</sup>                             |
| 2       | 5.31x10 <sup>5</sup>      | 102             | 5.62      | 4.54x10 <sup>-4</sup>                      | 3.40x10 <sup>-2</sup> | 3.71        | 1.00                    | 0.579           | 6.40      | 5.14x10 <sup>15</sup>                             |
| 3       | 5.73x10 <sup>5</sup>      | 104             | 5.62      | 7.70x10 <sup>-4</sup>                      | 4.43x10 <sup>-2</sup> | 3.81        | 1.12                    | 0.816           | 6.40      | 6.36x10 <sup>15</sup>                             |
| 4       | 5.73x10 <sup>5</sup>      | 100             | 5.62      | 1.41x10 <sup>-3</sup>                      | 5.99x10 <sup>-2</sup> | 3.87        | 1.26                    | 1.22            | 6.23      | 7.86x10 <sup>15</sup>                             |
| 5       | 5.73x10 <sup>5</sup>      | 113             | 5.62      | 1.67x10 <sup>-3</sup>                      | 6.52x10 <sup>-2</sup> | 3.64        | 1.30                    | 1.47            | 5.41      | 7.31x10 <sup>15</sup>                             |
| 6       | 5.73x10 <sup>5</sup>      | 93              | 5.62      | 3.61x10 <sup>-3</sup>                      | 9.58x10 <sup>-2</sup> | 3.97        | 1.52                    | 2.31            | 5.95      | 1.09x10 <sup>16</sup>                             |
| 7       | 8.23x10 <sup>5</sup>      | 51.0            | 13.5      | 1.85x10 <sup>-4</sup>                      | 2.17x10 <sup>-2</sup> | 11.1        | 0.839                   | 0.354           | 34.0      | 1.47x10 <sup>16</sup>                             |
| 8       | 8.23x10 <sup>5</sup>      | 66.6            | 13.5      | 2.63x10 <sup>-4</sup>                      | 2.59x10 <sup>-2</sup> | 9.68        | 0.900                   | 0.519           | 24.9      | 1.24x10 <sup>16</sup>                             |
| 9       | 9.06x10 <sup>5</sup>      | 72.6            | 13.5      | 4.26x10 <sup>-4</sup>                      | 3.29x10 <sup>-2</sup> | 9.71        | 1.00                    | 0.725           | 23.9      | 1.44x10 <sup>16</sup>                             |
| 10      | 8.23x10 <sup>5</sup>      | 70.9            | 13.5      | 6.99x10 <sup>-4</sup>                      | 4.22x10 <sup>-2</sup> | 9.36        | 1.09                    | 1.06            | 21.1      | 1.55x10 <sup>16</sup>                             |
| 11      | 9.06x10 <sup>5</sup>      | 72.4            | 13.5      | 1.01x10 <sup>-3</sup>                      | 5.08x10 <sup>-2</sup> | 9.71        | 1.18                    | 1.33            | 22.0      | 1.87x10 <sup>16</sup>                             |
| 12      | 9.90x10 <sup>5</sup>      | 63.8            | 13.5      | 2.20x10 <sup>-3</sup>                      | 7.48x10 <sup>-2</sup> | 10.6        | 1.38                    | 2.09            | 24.3      | 2.82x10 <sup>16</sup>                             |
| 13      | 1.36x10 <sup>6</sup>      | 76.8            | 5.62      | 8.27x10 <sup>-4</sup>                      | 4.59x10 <sup>-2</sup> | 6.84        | 1.11                    | 0.478           | 20.5      | 2.09x10 <sup>16</sup>                             |
| 14      | 1.41x10 <sup>6</sup>      | 81.2            | 5.62      | 1.51x10 <sup>-3</sup>                      | 6.19x10 <sup>-2</sup> | 6.75        | 1.28                    | 0.736           | 18.8      | 2.44x10 <sup>16</sup>                             |
| 15      | 1.45x10 <sup>6</sup>      | 70.4            | 5.62      | 2.85x10 <sup>-3</sup>                      | 8.52x10 <sup>-2</sup> | 7.31        | 1.45                    | 1.06            | 20.8      | 3.48x10 <sup>16</sup>                             |
| 16      | 1.41x10 <sup>6</sup>      | 73.7            | 5.62      | 4.57x10 <sup>-3</sup>                      | 0.108                 | 6.98        | 1.59                    | 1.55            | 18.0      | 3.64x10 <sup>16</sup>                             |
| 17      | 1.49x10 <sup>6</sup>      | 82.1            | 5.62      | 5.84x10 <sup>-3</sup>                      | 0.122                 | 6.80        | 1.67                    | 1.89            | 16.7      | 3.72x10 <sup>16</sup>                             |
| 18      | 1.57x10 <sup>6</sup>      | 107             | 5.62      | 8.50x10 <sup>-3</sup>                      | 0.147                 | 6.09        | 1.80                    | 2.74            | 12.9      | 3.34x10 <sup>16</sup>                             |
| 19      | 1.78x10 <sup>6</sup>      | 27.1            | 13.5      | 7.47x10 <sup>-4</sup>                      | 4.36x10 <sup>-2</sup> | 22.3        | 1.11                    | 0.468           | 119       | 8.97x10 <sup>16</sup>                             |
| 20      | 1.78x10 <sup>6</sup>      | 40.5            | 13.5      | 9.40x10 <sup>-4</sup>                      | 4.89x10 <sup>-2</sup> | 18.3        | 1.16                    | 0.670           | 78.4      | 6.48x10 <sup>16</sup>                             |
| 21      | 1.91x10 <sup>6</sup>      | 30.9            | 13.5      | 2.03x10 <sup>-3</sup>                      | 7.19x10 <sup>-2</sup> | 21.1        | 1.36                    | 0.991           | 97.5      | 1.10x10 <sup>17</sup>                             |
| 22      | 1.91x10 <sup>6</sup>      | 52.0            | 13.5      | 2.16x10 <sup>-3</sup>                      | 7.41x10 <sup>-2</sup> | 16.4        | 1.37                    | 1.33            | 58.3      | 6.72x10 <sup>16</sup>                             |
| 23      | 1.91x10 <sup>6</sup>      | 47.7            | 13.5      | 3.08x10 <sup>-3</sup>                      | 8.86x10 <sup>-2</sup> | 16.9        | 1.47                    | 1.66            | 59.8      | 7.94x10 <sup>16</sup>                             |
| 24      | 1.99x10 <sup>6</sup>      | 59.0            | 13.5      | 4.66x10 <sup>-3</sup>                      | 0.109                 | 15.5        | 1.60                    | 2.43            | 47.7      | 7.48x10 <sup>16</sup>                             |
| T1      | 7.40x10 <sup>5</sup>      | 68.8            | 8.37      | 2.49x10 <sup>-4</sup>                      | 2.52x10 <sup>-2</sup> | 6.86        | 0.890                   | 0.376           | 17.8      | 9.84x10 <sup>15</sup>                             |
| T2      | 1.16x10 <sup>6</sup>      | 124             | 8.37      | 6.47x10 <sup>-4</sup>                      | 4.06x10 <sup>-2</sup> | 6.38        | 1.08                    | 0.788           | 14.0      | 1.14x10 <sup>16</sup>                             |
| T3      | 1.20x10 <sup>6</sup>      | 94.9            | 8.37      | 3.65x10 <sup>-3</sup>                      | 9.64x10 <sup>-2</sup> | 7.30        | 1.52                    | 2.31            | 15.4      | 2.50x10 <sup>16</sup>                             |

**Table S2.** Inverse breakage rate constant, specific time and number of intermittent milling cycles for median particle size to reach 0.20  $\mu\text{m}$ , power, Merit Scores, and capital cost of the beads used in each run.

| Run No. | $1/k$<br>(min/ $\mu\text{m}^{1-n}$ ) | $t_{d50}$ (min) | $N_{d50}$ (-) | $N_{mc}$ (-) | $P$ (kW) | Merit Score (-) <sup>a</sup> | Merit Score (-) <sup>b</sup> | Price (\$) |
|---------|--------------------------------------|-----------------|---------------|--------------|----------|------------------------------|------------------------------|------------|
| 1       | 3.43                                 | 25.2            | 1             | 1            | 0.047    | 74.4                         | 64.6                         | 92.3       |
| 2       | 5.24                                 | 37.7            | 1             | 1            | 0.050    | 61.7                         | 48.5                         | 72.4       |
| 3       | 4.67                                 | 40.8            | 1             | 1            | 0.053    | 63.7                         | 44.5                         | 52.5       |
| 4       | 8.60                                 | 39.7            | 1             | 1            | 0.053    | 44.5                         | 45.5                         | 59.6       |
| 5       | 4.04                                 | 36.2            | 1             | 1            | 0.053    | 67.5                         | 49.0                         | 39.7       |
| 6       | 4.76                                 | 38.0            | 1             | 1            | 0.053    | 63.2                         | 47.2                         | 26.9       |
| 7       | 0.65                                 | 12.4            | 1             | 6            | 0.073    | 80.9                         | 71.5                         | 132        |
| 8       | 0.68                                 | 11.4            | 1             | 8            | 0.073    | 80.7                         | 73.0                         | 103        |
| 9       | 0.72                                 | 11.6            | 1             | 7            | 0.080    | 77.0                         | 69.7                         | 75.0       |
| 10      | 0.85                                 | 11.7            | 1             | 10           | 0.073    | 79.4                         | 72.6                         | 85.1       |
| 11      | 0.78                                 | 12.1            | 1             | 12           | 0.080    | 76.6                         | 68.9                         | 56.7       |
| 12      | 1.17                                 | 14.3            | 1             | 11           | 0.087    | 70.8                         | 63.1                         | 38.5       |
| 13      | 0.82                                 | 17.4            | 3             | 28           | 0.117    | 48.5                         | 39.1                         | 92.3       |
| 14      | 0.86                                 | 19.7            | 5             | 38           | 0.120    | 38.0                         | 29.3                         | 72.4       |
| 15      | 1.75                                 | 16.5            | 5             | 46           | 0.123    | 34.3                         | 30.7                         | 52.5       |
| 16      | 1.96                                 | 18.3            | 5             | 49           | 0.120    | 34.3                         | 30.2                         | 59.6       |
| 17      | 1.24                                 | 15.2            | 5             | 48           | 0.127    | 35.2                         | 30.9                         | 39.7       |
| 18      | 2.01                                 | 22.5            | 8             | 61           | 0.133    | 22.6                         | 18.2                         | 26.9       |
| 19      | 0.20                                 | 4.62            | 2             | 56           | 0.150    | 46.3                         | 46.3                         | 132        |
| 20      | 0.21                                 | 5.71            | 3             | 75           | 0.150    | 41.4                         | 40.5                         | 103        |
| 21      | 0.33                                 | 7.12            | 3             | 77           | 0.160    | 38.4                         | 36.9                         | 75.0       |
| 22      | 0.41                                 | 6.23            | 3             | 75           | 0.160    | 38.1                         | 37.6                         | 85.1       |
| 23      | 0.53                                 | 6.83            | 3             | 78           | 0.160    | 37.7                         | 37.1                         | 56.7       |
| 24      | 0.65                                 | 9.65            | 6             | 106          | 0.167    | 25.7                         | 24.1                         | 38.5       |

<sup>a</sup>Merit score calculated via  $1/k$ ,  $P$ , and  $N_{d50}$ . <sup>b</sup>Merit score calculated via  $t_{d50}$ ,  $P$ , and  $N_{d50}$ .

**Table S3.** Root mean squared errors of the machine learning models based on MHD and process parameters.

| Model                  | MHD parameters     |       | Process parameters |       |
|------------------------|--------------------|-------|--------------------|-------|
|                        | Train <sup>a</sup> | Test  | Train <sup>a</sup> | Test  |
| Linear regression      | 0.346              | 0.241 | 0.553              | 0.493 |
| Lasso regression       | 0.806              | 0.358 | 0.806              | 0.358 |
| Ridge regression       | 0.332              | 0.213 | 0.523              | 0.491 |
| Elastic net regression | 0.440              | 0.180 | 0.518              | 0.465 |
| Decision tree          | 0.400              | 0.526 | 0.474              | 0.116 |
| Gradient boost         | 0.394              | 0.361 | 0.508              | 0.179 |
| Random forest          | 0.414              | 0.308 | 0.489              | 0.198 |
| k-nearest neighborhood | 0.382              | 0.242 | 0.478              | 0.192 |

<sup>a</sup>RMSE of the leave-one-out cross validated predictions are reported.

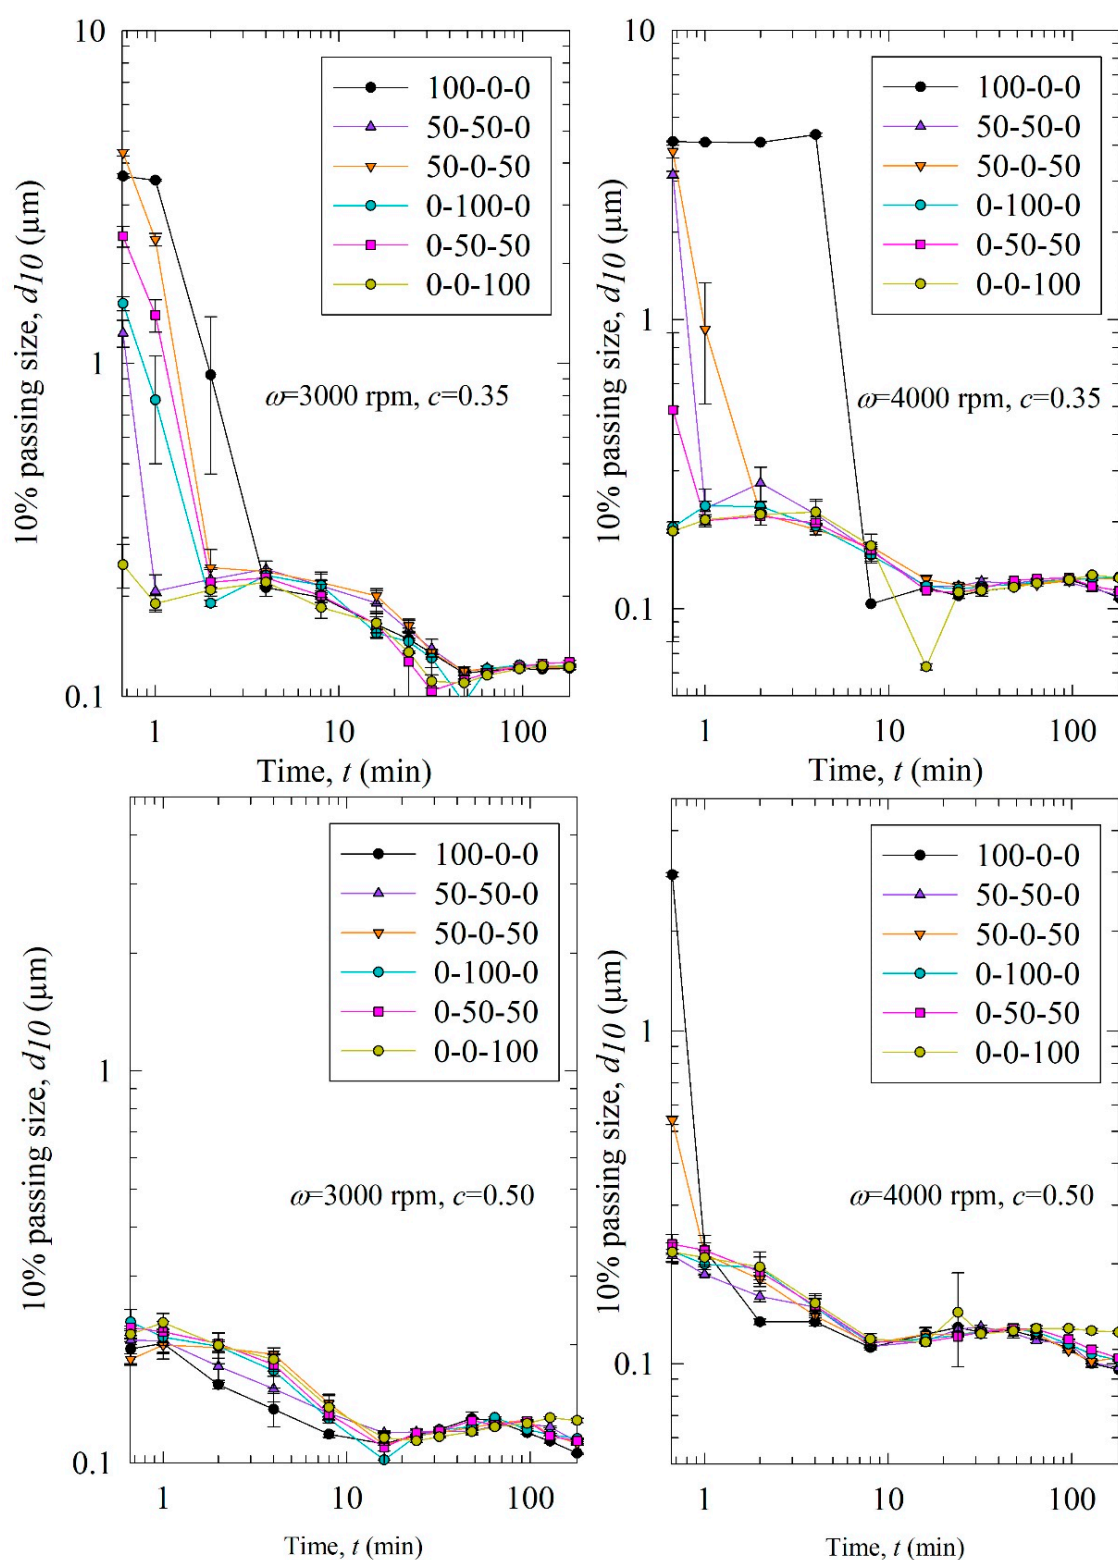

**Figure S1.** Timewise evolution of the 10% passing drug particle size  $d_{10}$  during 180 min of milling with various mass fractions of 100-200-400 μm beads at different stirrer speeds  $\omega$ –bead loadings  $c$ .

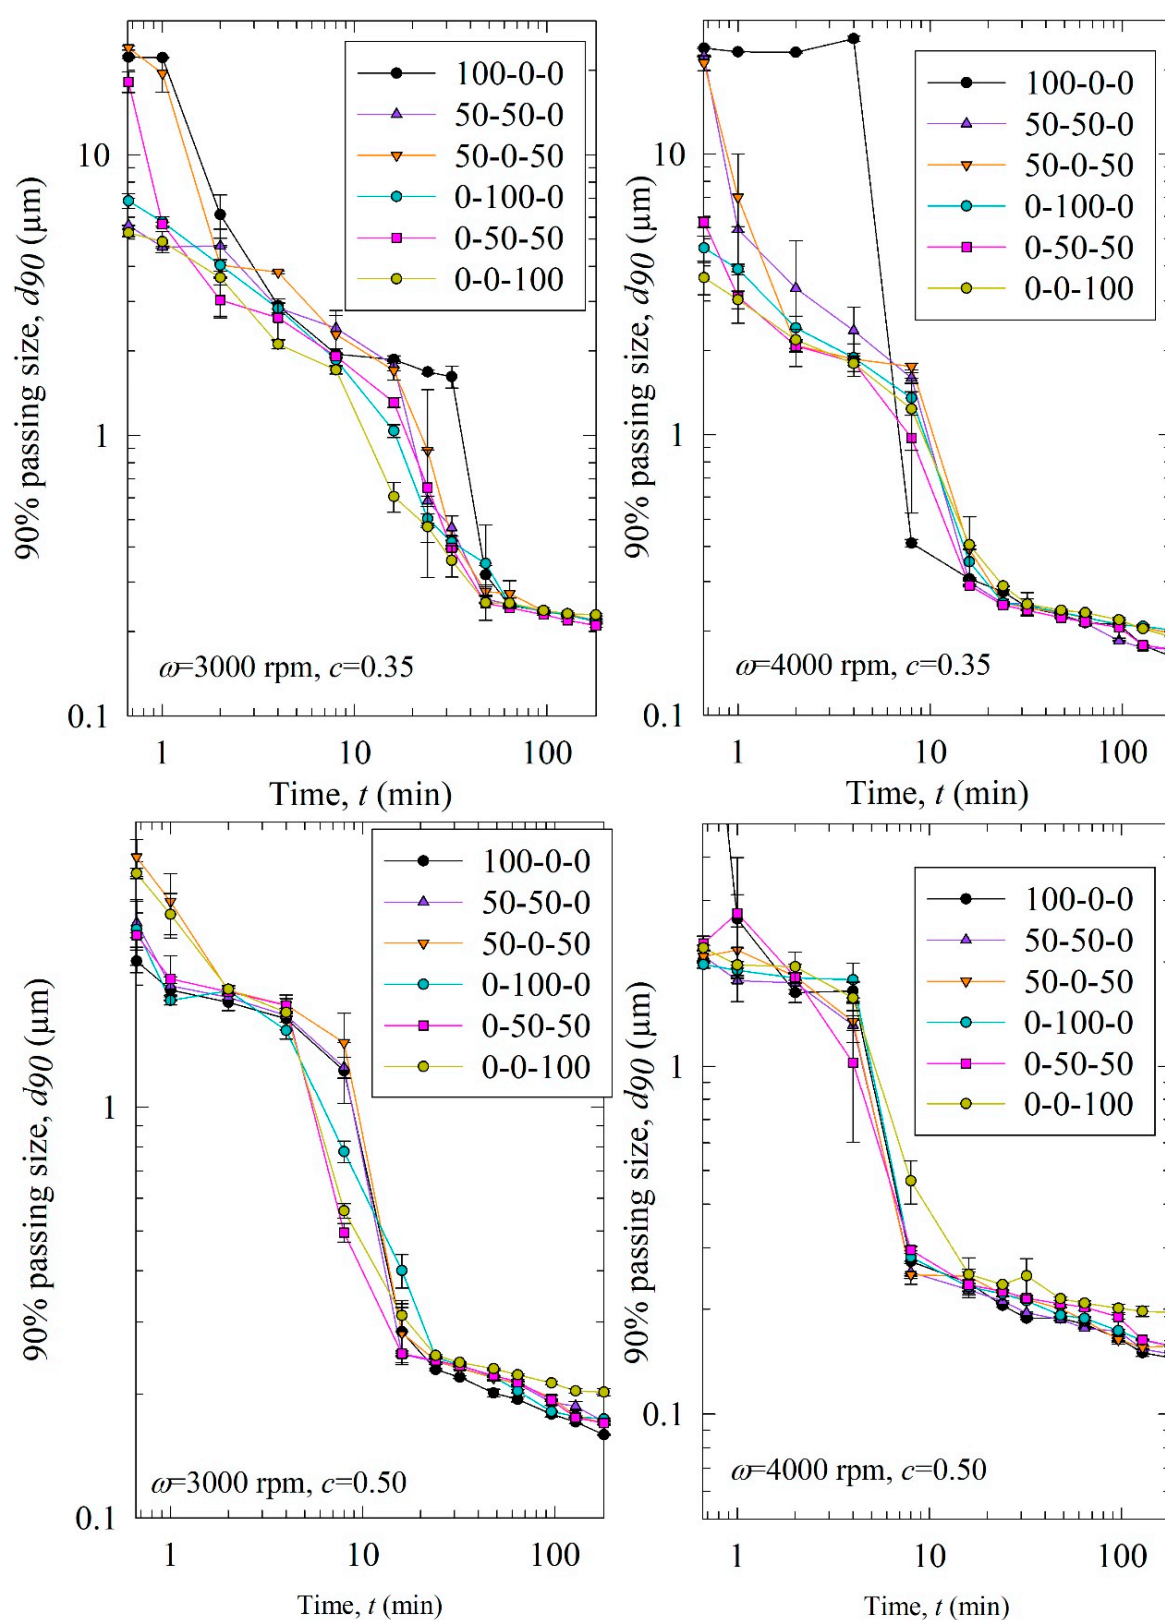

**Figure S2.** Timewise evolution of the 90% passing drug particle size  $d_{90}$  during 180 min of milling with various mass fractions of 100-200-400  $\mu\text{m}$  beads at different stirrer speeds  $\omega$ -bead loadings  $c$ .

## S2. JMP regression report for the dependence of breakage rate constant $k$ on stirrer speed ( $\omega$ ), bead loading ( $c$ ), and average bead size ( $D_b$ )

### Whole Model Actual by Predicted Plot

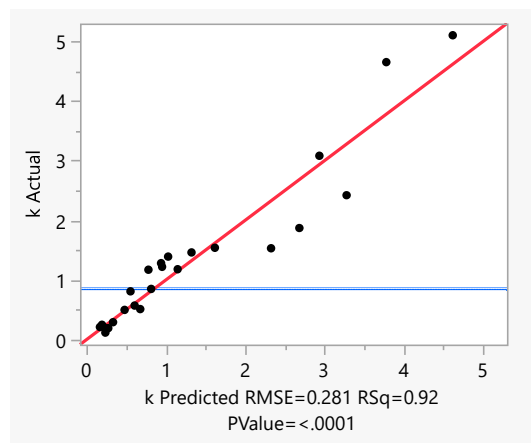

### Effect Summary

| Source           | Logworth | PValue  |
|------------------|----------|---------|
| Log(BeadLoading) | 159.616  | 0.00000 |
| Log(RPM)         | 110.146  | 0.00000 |
| Log( $D_b$ (mm)) | 37.115   | 0.00000 |

### Summary of Fit

|                            |          |
|----------------------------|----------|
| RSquare                    | 0.923995 |
| RSquare Adj                | 0.923308 |
| Root Mean Square Error     | 0.28097  |
| Mean of Response           | -0.15459 |
| Observations (or Sum Wgts) | 336      |

### Analysis of Variance

| Source   | DF  | Sum of Squares | Mean Square | F Ratio            |
|----------|-----|----------------|-------------|--------------------|
| Model    | 3   | 318.62888      | 106.210     | 1345.379           |
| Error    | 332 | 26.20942       | 0.079       | <b>Prob &gt; F</b> |
| C. Total | 335 | 344.83830      |             | <b>&lt;.0001*</b>  |

### Parameter Estimates

| Term             | Estimate  | Std Error | t Ratio | Prob> t           |
|------------------|-----------|-----------|---------|-------------------|
| Intercept        | -28.82373 | 0.870937  | -33.10  | <b>&lt;.0001*</b> |
| Log(RPM)         | 3.6457431 | 0.106563  | 34.21   | <b>&lt;.0001*</b> |
| Log(BeadLoading) | 4.4253755 | 0.08595   | 51.49   | <b>&lt;.0001*</b> |
| Log( $D_b$ (mm)) | -0.49435  | 0.033738  | -14.65  | <b>&lt;.0001*</b> |

Note: \* indicates statistical significance: p-value < 0.01 (orange color) and  $0.01 \leq$  p-value < 0.05 (red color); \* was not shown for lack of significance, i.e., p-value  $\geq$  0.05 (black color in the probability column).

### S3. JMP regression report for the dependence of average stirrer power per unit volume ( $P_w$ ) on stirrer speed ( $w$ ), bead loading ( $c$ ), average bead size ( $D_b$ ), and viscosity

Response Log( $P_w$ )

Whole Model, Actual by Predicted Plot

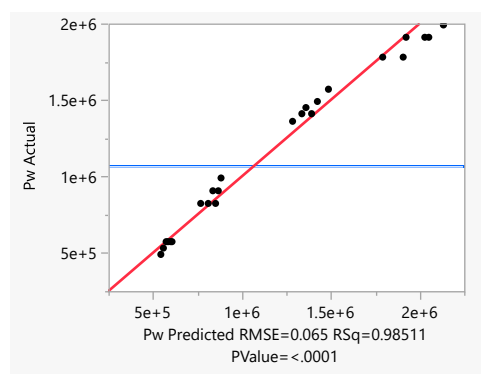

#### Effect Summary

| Source         | LogWorth | PValue  |
|----------------|----------|---------|
| Log( $w$ )     | 14.223   | 0.00000 |
| Log( $c$ )     | 6.147    | 0.00000 |
| Log( $D_b$ )   | 1.853    | 0.01403 |
| Log(viscosity) | 0.338    | 0.45912 |

#### Summary of Fit

|                            |          |
|----------------------------|----------|
| RSquare                    | 0.98511  |
| RSquare Adj                | 0.981976 |
| Root Mean Square Error     | 0.065042 |
| Mean of Response           | 13.88355 |
| Observations (or Sum Wgts) | 24       |

#### Analysis of Variance

| Source   | DF | Sum of Squares | Mean Square | F Ratio            |
|----------|----|----------------|-------------|--------------------|
| Model    | 4  | 5.3178261      | 1.32946     | 314.2611           |
| Error    | 19 | 0.0803780      | 0.00423     | <b>Prob &gt; F</b> |
| C. Total | 23 | 5.3982041      |             | <b>&lt;.0001*</b>  |

#### Parameter Estimates

| Term           | Estimate  | Std Error | t Ratio | Prob> t           |
|----------------|-----------|-----------|---------|-------------------|
| Intercept      | -11.01764 | 1.278806  | -8.62   | <b>&lt;.0001*</b> |
| Log( $w$ )     | 3.0824606 | 0.140627  | 21.92   | <b>&lt;.0001*</b> |
| Log( $c$ )     | 1.1182391 | 0.15444   | 7.24    | <b>&lt;.0001*</b> |
| Log( $D_b$ )   | 0.0900235 | 0.033277  | 2.71    | <b>0.0140*</b>    |
| Log(viscosity) | 0.06392   | 0.084588  | 0.76    | 0.4591            |

Note: \* indicates statistical significance:  $p\text{-value} < 0.01$  (orange color) and  $0.01 \leq p\text{-value} < 0.05$  (red color); \* was not shown for lack of significance, i.e.,  $p\text{-value} \geq 0.05$  (black color in the probability column).



## S4. JMP regression report for the dependence of viscosity of the nanosuspensions on the stirrer speed ( $w$ ), bead loading ( $c$ ), and average bead size ( $D_b$ )

Response Log(viscosity)

Whole Model, Actual by Predicted Plot

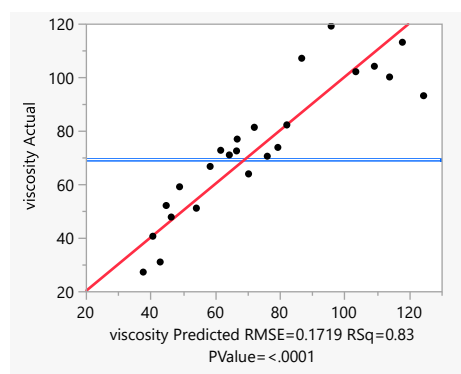

### Effect Summary

| Source  | LogWorth | PValue  |
|---------|----------|---------|
| Log(c)  | 7.041    | 0.00000 |
| Log(w)  | 4.303    | 0.00005 |
| Log(Db) | 1.614    | 0.02432 |

### Summary of Fit

|                            |          |
|----------------------------|----------|
| RSquare                    | 0.831127 |
| RSquare Adj                | 0.805796 |
| Root Mean Square Error     | 0.171936 |
| Mean of Response           | 4.238615 |
| Observations (or Sum Wgts) | 24       |

### Analysis of Variance

| Source   | DF | Sum of Squares | Mean Square | F Ratio            |
|----------|----|----------------|-------------|--------------------|
| Model    | 3  | 2.9098542      | 0.969951    | 32.8108            |
| Error    | 20 | 0.5912397      | 0.029562    | <b>Prob &gt; F</b> |
| C. Total | 23 | 3.5010939      |             | <b>&lt;.0001*</b>  |

### Parameter Estimates

| Term      | Estimate  | Std Error | t Ratio | Prob> t           |
|-----------|-----------|-----------|---------|-------------------|
| Intercept | 12.05937  | 2.0387    | 5.92    | <b>&lt;.0001*</b> |
| Log(w)    | -1.254273 | 0.243994  | -5.14   | <b>&lt;.0001*</b> |
| Log(c)    | -1.599659 | 0.196797  | -8.13   | <b>&lt;.0001*</b> |
| Log(Db)   | 0.1881845 | 0.077249  | 2.44    | <b>0.0243*</b>    |

Note: \* indicates statistical significance: p-value < 0.01 (orange color) and  $0.01 \leq$  p-value < 0.05 (red color); \* was not shown for lack of significance, i.e., p-value  $\geq$  0.05 (black color in the probability column).

## S5. JMP regression report for the dependence of viscosity of the nanosuspensions on their final median particle size ( $d_{f50}$ )

Response Log(viscosity)

Whole Model, Regression Plot

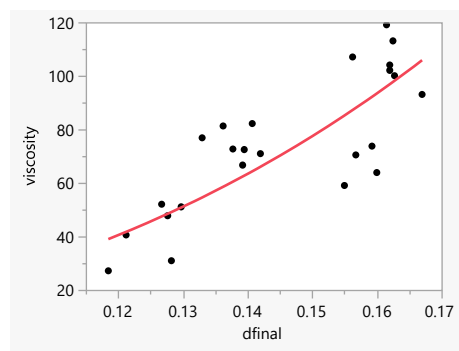

### Summary of Fit

|                            |          |
|----------------------------|----------|
| RSquare                    | 0.652295 |
| RSquare Adj                | 0.63649  |
| Root Mean Square Error     | 0.235232 |
| Mean of Response           | 4.238615 |
| Observations (or Sum Wgts) | 24       |

### Analysis of Variance

| Source   | DF | Sum of Squares | Mean Square | F Ratio            |
|----------|----|----------------|-------------|--------------------|
| Model    | 1  | 2.2837446      | 2.28374     | 41.2720            |
| Error    | 22 | 1.2173493      | 0.05533     | <b>Prob &gt; F</b> |
| C. Total | 23 | 3.5010939      |             | <.0001*            |

### Parameter Estimates

| Term        | Estimate  | Std Error | t Ratio | Prob> t |
|-------------|-----------|-----------|---------|---------|
| Intercept   | 9.8707802 | 0.878008  | 11.24   | <.0001* |
| Log(dfinal) | 2.9107467 | 0.453082  | 6.42    | <.0001* |

Note: \* indicates statistically significance: p-value < 0.01 (orange color) and  $0.01 \leq$  p-value < 0.05 (red color); \* was not shown for lack of significance, i.e., p-value  $\geq$  0.05 (black color in the probability column).
